# Supplementary material
Source: PubMed Central journal article supplement (PMC8409526)

---

**Supplementary information**

---

**Autophagy promotes growth of tumors with high mutational burden by inhibiting a T-cell immune response**

---

In the format provided by the authors and unedited

**Supplementary Fig. 1: Flow Cytometry Gating Strategy (Spleen)**

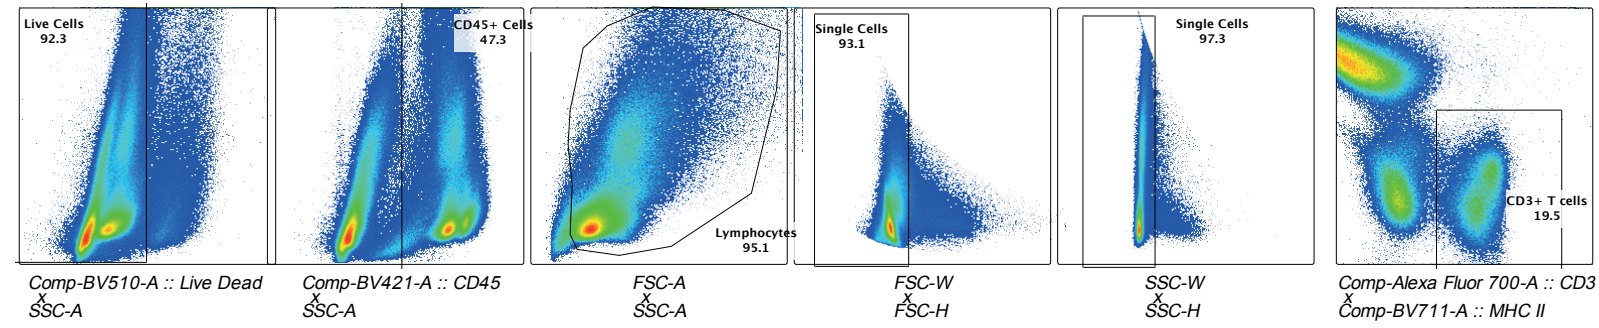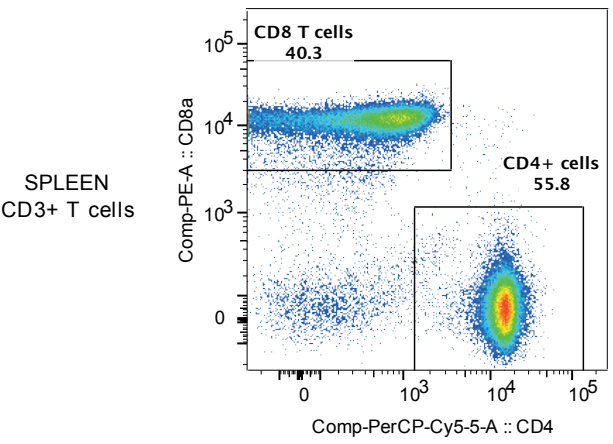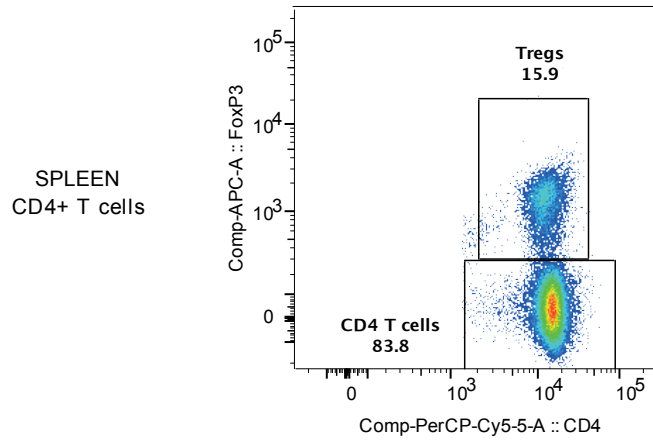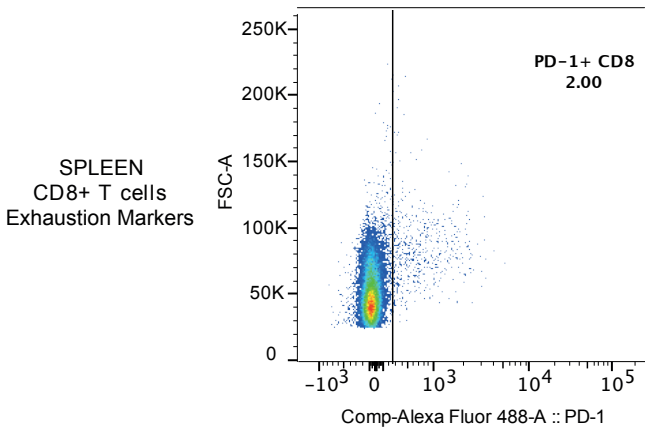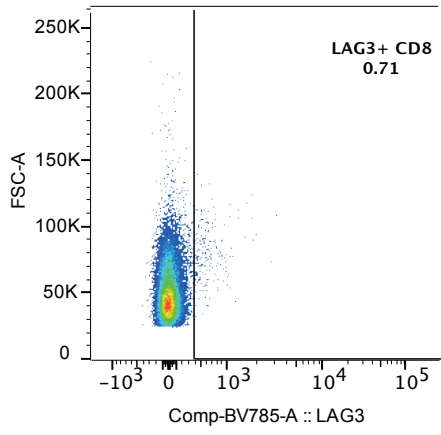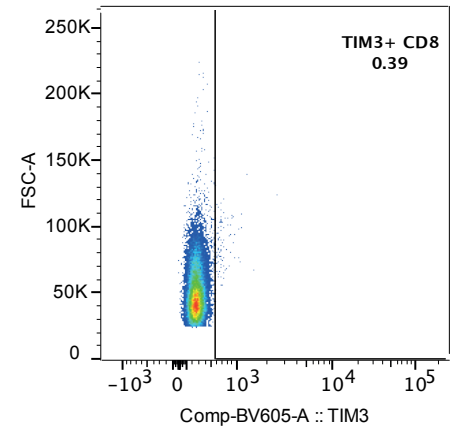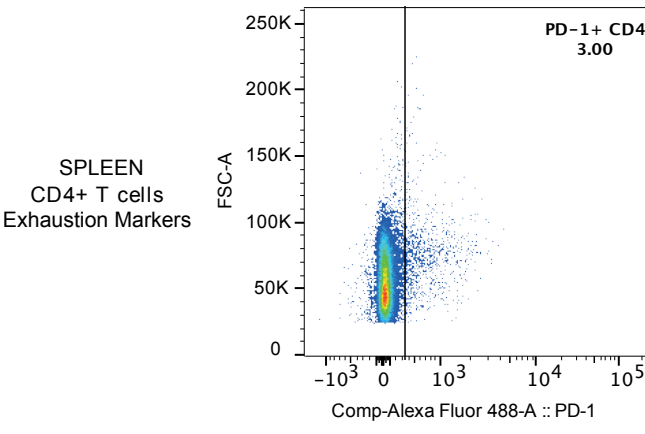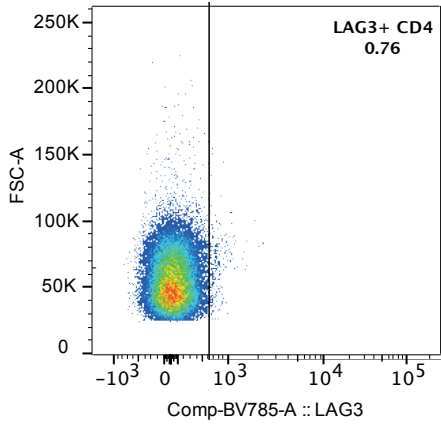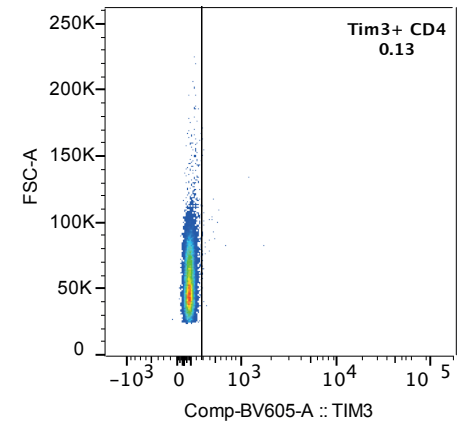

Supplement: NIHMS1716268-supplement-Supplementary_Figure_1.pdf [file NIHMS1716268-supplement-Supplementary_Figure_1.pdf]
