# Supplementary material
Source: PubMed Central journal article supplement (PMC8409526)
Supplement: NIHMS1716268-supplement-Supplementary_Tables1-3__10-13.pdf [file NIHMS1716268-supplement-Supplementary_Tables1-3__10-13.pdf]

**Supplementary Table 1:** Unchanged cytokines or chemokines ( $p > 0.05$  by two-sided T-test) in serum from Atg7 $\Delta/\Delta$  (n=8) vs Atg7 $+/+$  (n=4) hosts without tumors.

| Cytokine/Chemokine name | Mean concentration in Atg7 $+/+$ host (pg/ml) | Mean concentration in Atg7 $\Delta/\Delta$ host (pg/ml) | p values |
|-------------------------|-----------------------------------------------|---------------------------------------------------------|----------|
| CCL5                    | 31.19                                         | 88.56                                                   | 0.11     |
| CXCL1                   | 1.43                                          | 12.47                                                   | 0.35     |
| Eotaxin                 | 229.80                                        | 210.50                                                  | 0.55     |
| GM-CSF                  | 2.83                                          | 2.83                                                    | 0.51     |
| IFN-gamma               | 0.93                                          | 1.64                                                    | 0.57     |
| IL-12p70                | 0.31                                          | 0.48                                                    | 0.48     |
| IL-13                   | 2.09                                          | 2.43                                                    | 0.54     |
| IL-17A                  | 1.45                                          | 1.45                                                    | 0.51     |
| IL-18                   | 45.65                                         | 88.10                                                   | 0.40     |
| IL-1b                   | 0.99                                          | 1.42                                                    | 0.46     |
| IL-2                    | 1.81                                          | 1.81                                                    | 0.51     |
| IL-22                   | 7.81                                          | 10.14                                                   | 0.65     |
| IL-23                   | 8.74                                          | 9.72                                                    | 0.59     |
| IL-27                   | 2.92                                          | 2.93                                                    | 1.00     |
| IL-4                    | 1.24                                          | 1.25                                                    | 0.96     |
| IL-5                    | 2.59                                          | 13.94                                                   | 0.41     |
| IL-6                    | 3.65                                          | 13.19                                                   | 0.19     |
| IL-9                    | 19.20                                         | 21.84                                                   | 0.66     |
| IL-10                   | 2.69                                          | 1.71                                                    | 0.10     |
| MCP-3                   | 40.86                                         | 78.66                                                   | 0.09     |
| MIP-1a                  | 0.87                                          | 5.82                                                    | 0.43     |
| MIP-1b                  | 0.96                                          | 0.96                                                    | 0.51     |
| MIP-2                   | 1.11                                          | 1.33                                                    | 0.77     |
| TNFa                    | 8.51                                          | 9.16                                                    | 0.89     |

**Supplementary Table 2:** Unchanged cytokines or chemokines ( $p > 0.05$  by two-sided T-test) in serum from Atg7 $\Delta/\Delta$  vs Atg7 $+/+$  (n=12 each) hosts with tumors.

| <b>Cytokine/Chemokine name</b> | <b>Mean concentration in Atg7<math>+/+</math> host (pg/ml)</b> | <b>Mean concentration in Atg7<math>\Delta/\Delta</math> host (pg/ml)</b> | <b>p values</b> |
|--------------------------------|----------------------------------------------------------------|--------------------------------------------------------------------------|-----------------|
| CCL5                           | 92.64                                                          | 106.90                                                                   | 0.79            |
| Eotaxin                        | 339.20                                                         | 292.40                                                                   | 0.29            |
| GM-CSF                         | 2.55                                                           | 2.61                                                                     | 0.82            |
| IFN-gamma                      | 1.00                                                           | 1.47                                                                     | 0.22            |
| IL-12p70                       | 1.23                                                           | 1.62                                                                     | 0.11            |
| IL-13                          | 9.20                                                           | 9.27                                                                     | 0.99            |
| IL-17A                         | 0.48                                                           | 0.56                                                                     | 0.17            |
| IL-18                          | 180.80                                                         | 268.50                                                                   | 0.57            |
| IL-1b                          | 0.25                                                           | 0.33                                                                     | 0.28            |
| IL-2                           | 1.73                                                           | 1.81                                                                     | 0.33            |
| IL-22                          | 32.45                                                          | 26.03                                                                    | 0.68            |
| IL-23                          | 14.41                                                          | 24.76                                                                    | 0.36            |
| IL-27                          | 52.71                                                          | 84.55                                                                    | 0.57            |
| IL-4                           | 0.60                                                           | 0.50                                                                     | 0.45            |
| IL-5                           | 17.66                                                          | 19.04                                                                    | 0.78            |
| IL-9                           | 231.90                                                         | 239.20                                                                   | 0.97            |
| IP10                           | 47.21                                                          | 51.11                                                                    | 0.81            |
| IL-10                          | 3.96                                                           | 4.38                                                                     | 0.78            |
| MCP-3                          | 172.80                                                         | 179.20                                                                   | 0.83            |
| MIP-1a                         | 18.94                                                          | 7.98                                                                     | 0.46            |
| MIP-1b                         | 1.04                                                           | 1.32                                                                     | 0.54            |
| MIP-2                          | 3.05                                                           | 4.88                                                                     | 0.12            |
| TNFa                           | 9.51                                                           | 12.12                                                                    | 0.22            |

**Supplementary Table 3:** Number of synonymous and non-synonymous mutations in MB49, YUMM1.1, UV YUMM1.1-9 and YUMM1.3 cell lines as determined by whole exome sequencing.

|                     | <b>Synonymous Mutations</b> | <b>Non Synonymous Mutations</b> | <b>Total</b> | <b>Mt/Mb</b> |
|---------------------|-----------------------------|---------------------------------|--------------|--------------|
| <b>MB49</b>         | 165                         | 542                             | 707          | 11           |
| <b>YUMM1.1</b>      | 128                         | 301                             | 429          | 6            |
| <b>UV YUMM1.1-9</b> | 346                         | 741                             | 1087         | 15           |
| <b>YUMM1.3</b>      | 57                          | 168                             | 225          | 3            |

**Supplementary Table 10:** Cell numbers for each cluster in tumors from female Atg7<sup>+/+</sup> and Atg7<sup>Δ/Δ</sup> hosts (n=4 each).

|                          | Atg7 <sup>+/+</sup> |      |      |      | Atg7 <sup>Δ/Δ</sup> |      |     |      |
|--------------------------|---------------------|------|------|------|---------------------|------|-----|------|
|                          | 1                   | 2    | 3    | 4    | 1                   | 2    | 3   | 4    |
| <b>Tumor cells</b>       | 1354                | 1479 | 4410 | 3351 | 53                  | 159  | 108 | 124  |
| <b>T cells</b>           | 57                  | 337  | 544  | 519  | 221                 | 340  | 179 | 779  |
| <b>Monocytes</b>         | 66                  | 239  | 335  | 340  | 298                 | 162  | 40  | 1396 |
| <b>Macrophages</b>       | 762                 | 1030 | 631  | 1216 | 2156                | 1633 | 209 | 2190 |
| M1                       | 269                 | 258  | 43   | 126  | 685                 | 516  | 46  | 346  |
| M2                       | 484                 | 444  | 242  | 530  | 1300                | 1318 | 162 | 1149 |
| <b>Dendritic cells</b>   | 8                   | 36   | 89   | 110  | 217                 | 33   | 69  | 95   |
| <b>Fibroblasts</b>       | 56                  | 24   | 61   | 75   | 918                 | 83   | 359 | 388  |
| <b>Endothelial cells</b> | 8                   | 8    |      |      | 28                  | 44   |     |      |

\*\* endothelial and B cells are minor/rare cell population in this experiment and discounted for further analysis

**Supplementary Table 11:** Unchanged cytokines or chemokines ( $p > 0.05$  by two-sided T-test) in serum from hepatocyte-specific Atg7 $\Delta/\Delta$  vs Atg7 $+/+$  ( $n=6$  each) hosts with tumors.

| <b>Cytokine/Chemokine name</b> | <b>Mean concentration in Atg7<math>+/+</math> host (pg/ml)</b> | <b>Mean concentration in Atg7<math>\Delta/\Delta</math> host (pg/ml)</b> | <b>p values</b> |
|--------------------------------|----------------------------------------------------------------|--------------------------------------------------------------------------|-----------------|
| CCL5                           | 65.71                                                          | 183.30                                                                   | 0.11            |
| CXCL1                          | 4.07                                                           | 11.60                                                                    | 0.10            |
| GM-CSF                         | 2.83                                                           | 3.01                                                                     | 0.34            |
| IFN-gamma                      | 0.93                                                           | 1.33                                                                     | 0.44            |
| IL-13                          | 18.47                                                          | 14.20                                                                    | 0.83            |
| IL-17A                         | 0.35                                                           | 0.62                                                                     | 0.21            |
| IL-18                          | 56.45                                                          | 62.90                                                                    | 0.78            |
| IL-1b                          | 0.72                                                           | 1.58                                                                     | 0.36            |
| IL-2                           | 1.42                                                           | 1.49                                                                     | 0.84            |
| IL-22                          | 63.28                                                          | 74.72                                                                    | 0.80            |
| IL-23                          | 8.39                                                           | 9.13                                                                     | 0.64            |
| IL-27                          | 114.70                                                         | 187.40                                                                   | 0.72            |
| IL-4                           | 0.24                                                           | 0.47                                                                     | 0.30            |
| IL-5                           | 10.93                                                          | 16.44                                                                    | 0.37            |
| IL-6                           | 3.74                                                           | 5.54                                                                     | 0.51            |
| IL-9                           | 460.10                                                         | 530.20                                                                   | 0.91            |
| IL-10                          | 2.88                                                           | 4.74                                                                     | 0.39            |
| MCP-3                          | 79.95                                                          | 94.88                                                                    | 0.54            |
| MIP-1a                         | 12.21                                                          | 12.42                                                                    | 0.99            |
| MIP-2                          | 1.44                                                           | 9.91                                                                     | 0.25            |

**Supplementary Table 12:** Unchanged cytokines or chemokines ( $p > 0.05$  by two-sided T-test) in liver from hepatocyte-specific Atg7 $\Delta/\Delta$  vs Atg7 $+/+$  (n=6 each) hosts with tumors.

| Cytokine/Chemokine name | Mean concentration in Atg7 $+/+$ host (pg/ml) | Mean concentration in Atg7 $\Delta/\Delta$ host (pg/ml) | p values |
|-------------------------|-----------------------------------------------|---------------------------------------------------------|----------|
| Eotaxin                 | 286.80                                        | 250.5                                                   | 0.55     |
| IFN-gamma               | 339.40                                        | 421.2                                                   | 0.30     |
| IL-12p70                | 212.10                                        | 207.6                                                   | 0.92     |
| IL-13                   | 233.00                                        | 380.5                                                   | 0.07     |
| IL-17A                  | 58.81                                         | 91.74                                                   | 0.11     |
| IL-2                    | 298.40                                        | 461.3                                                   | 0.15     |
| IL-22                   | 168.60                                        | 319.2                                                   | 0.08     |
| IL-23                   | 1521.00                                       | 2145                                                    | 0.12     |
| IL-27                   | 189.70                                        | 352.9                                                   | 0.06     |
| IL-4                    | 30.86                                         | 44.34                                                   | 0.44     |
| IL-5                    | 213.50                                        | 319.9                                                   | 0.18     |
| IL-9                    | 4621.00                                       | 6104                                                    | 0.19     |
| IL6                     | 2381.00                                       | 2949                                                    | 0.31     |
| IL-10                   | 12243.00                                      | 15588                                                   | 0.16     |
| MCP-3                   | 120.50                                        | 202.1                                                   | 0.10     |
| MIP-2                   | 173.80                                        | 228.2                                                   | 0.17     |
| TNFa                    | 875.50                                        | 1159                                                    | 0.18     |

**Supplementary Table 13:** Sample cell numbers used for scRNA-seq analysis in tumors from female Atg7<sup>+/+</sup> and Atg7 $\Delta/\Delta$  hosts (n=4 each).

| <b>Genotype</b>                       | <b>Sample</b> | <b>Starting Cells</b> | <b>Filtered Cells</b> | <b>Fractions of recovered cells</b> |
|---------------------------------------|---------------|-----------------------|-----------------------|-------------------------------------|
| <b>Atg7<sup>+/+</sup></b>             | 1             | 2856                  | 2295                  | 0.803571429                         |
|                                       | 2             | 3440                  | 3153                  | 0.916569767                         |
|                                       | 3             | 6184                  | 6070                  | 0.98156533                          |
|                                       | 4             | 5961                  | 5611                  | 0.941285019                         |
| <b>Atg7<math>\Delta/\Delta</math></b> | 1             | 4266                  | 3948                  | 0.925457103                         |
|                                       | 2             | 2680                  | 2454                  | 0.915671642                         |
|                                       | 3             | 1004                  | 964                   | 0.960159363                         |
|                                       | 4             | 5095                  | 5001                  | 0.98155054                          |
